# Supplementary material for: Pharmacogenetic Study of Anti-TB Drugs in the Native Ancestry Peruvian Population
Source: Research Square preprint supplement (doi:10.21203/rs.3.rs-5742453/v1), 2025-03-25
Supplement: Supplementary file 1 [file 42b3da7baaf3d8efa9bb724a.xlsx]

## Sheet: Hoja1
Table S3: Association between Native Subpopulations and High-Risk Genotypes with non-statistically significant differences
NAT2 gene
rs1799929	Hepatotoxicity probably				Total
	Yes ( TT / TC)		No (CC)				OR	CI (95%)	p-Value
	N	%	N	%	N	%
Coast	38	44.186	48	55.814	86	33.8583	Ref
Andean	32	32.3232	67	67.6768	99	38.9764	0.6	0,32 - 1,15	0.097
Amazon	15	21.7391	54	78.2609	69	27.1	2.46	0.19 - 130,88	0.426
rs1799931	Yes ( AA / AG)		No (GG)
Coast	42	48.8372	44	51.1628	86	33.8583	Ref
Andean	49	49.4949	50	50.5051	99	38.9764	1.03	0,55 -91	0.929
Amazon	41	59.4203	28	40.5797	69	27.1	1.53	0.77 - 3,06	0.189
*High-Risk from 1000 Genomes Project Frequencies (%):PEL: 40.0, EUR: 35.0, EAS: 30.0, AFR: 25.0
CYP 2B6
rs3745274	Hepatotoxicity probably				Total
	Yes (TT)		No (CC/ CT)				OR	CI (95%)	p-Value
	N	%	N	%	N	%
Coast	22	25.5814	64	74.4186	86	33.8583	Ref
Andean	23	23.2323	76	76.7677	99	38.9764	0.88	0,43 - 1,83	0.71
Amazon	10	14.4928	59	85.5072	69	27.1	0.49	0,19 - 1,20	0.09
*High-Risk from 1000 Genomes Project Frequencies (%):EUR: 5.0, EAS: 0.0, AFR: 10.0, AMR: 5.0
